# Supplementary material
Source: PubMed Central journal article supplement (PMC3457229)
Supplement: JB.00948-12_zjb999091970so1.pdf [file JB.00948-12_zjb999091970so1.pdf]

1 Supplementary data for Edwards, 2012 Phenotype-switching is a natural consequence of  
2 *Staphylococcus aureus* replication.

3  
4  
5  
6

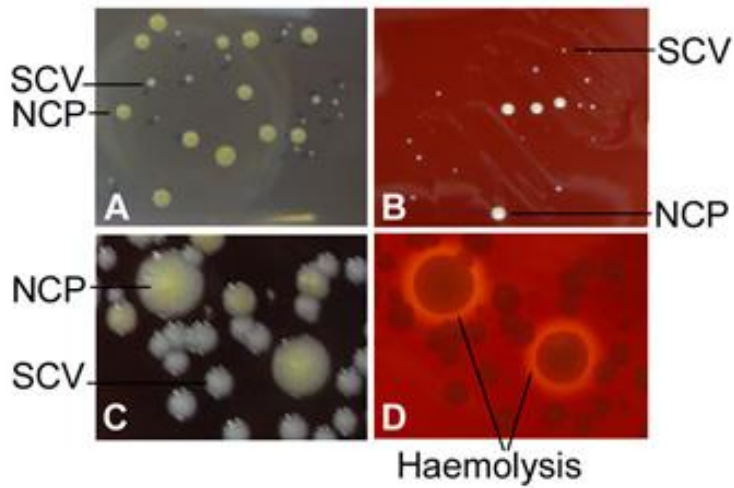

7  
8  
9  
10  
11  
12  
13  
14  
15  
16  
17  
18  
19  
20  
21  
22  
23

Figure S1. Phenotypic identification of SCVs. NCP *S. aureus* forms large pigmented colonies on TSA (A) or blood agar (B), whilst SCVs appear as small, non-pigmented colonies. Closer inspection of colonies (C) highlights differences in size, whilst analysis of haemolysis (D) reveals that NCPs but not SCVs have haemolytic activity.

24  
25  
26  
27  
28

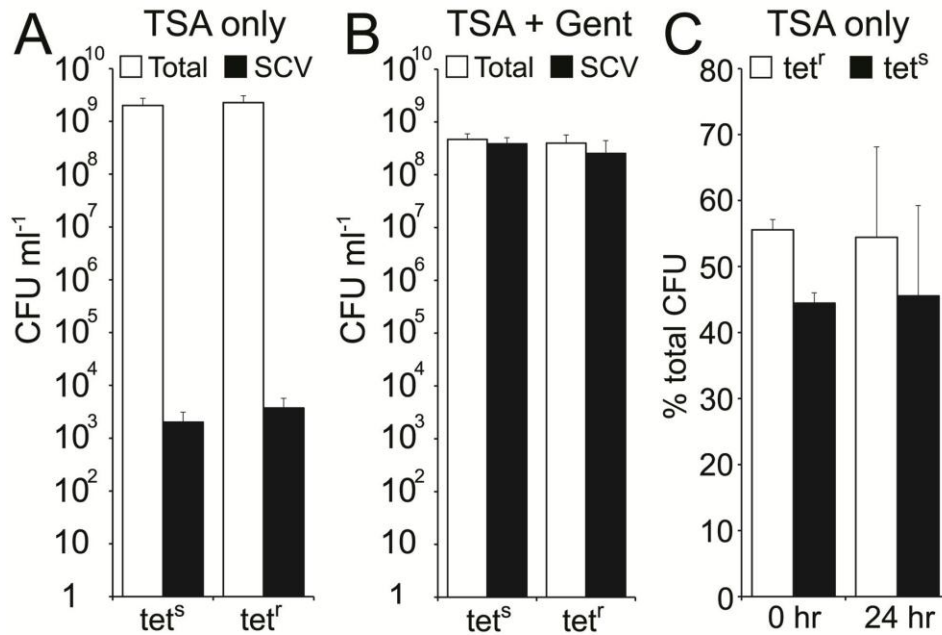

29  
30  
31  
32  
33  
34  
35  
36  
37  
38  
39  
40  
41  
42  
43  
44

Figure S2. Tetracycline-resistant (tet<sup>R</sup>) *S. aureus* produces the same number of SCVs as the parental tetracycline-sensitive (tet<sup>S</sup>) strain in the absence (A) or presence (B) of gentamicin. The presence of the tet<sup>R</sup> gene does not confer a competitive disadvantage; tet<sup>R</sup> and tet<sup>S</sup> *S. aureus* were mixed in a roughly 1:1 ratio (0 hr) and grown for 24 hr (C). The final % tet<sup>R</sup> colonies was the same as the inoculum (C).

45

46

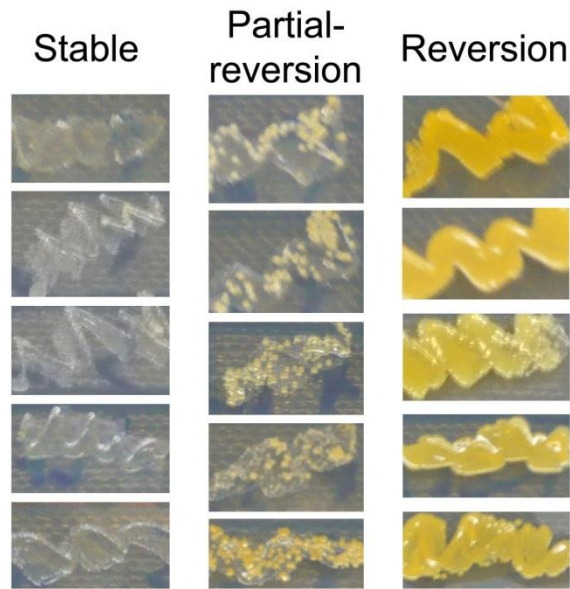

47

48

49 Figure S3. A basic scoring system for SCV stability. SCVs were patched onto antibiotic-free TSA and  
50 incubated for 24 hr. Some colonies retained the SCV phenotype and were classified as stable. Some  
51 colonies were a mix of SCV and NCP phenotype and were considered to have partially reverted (to NCP).  
52 Finally, some colonies completely reverted to the NCP.

53

54

55

56

57

58

59

60

61

62

63

64

65

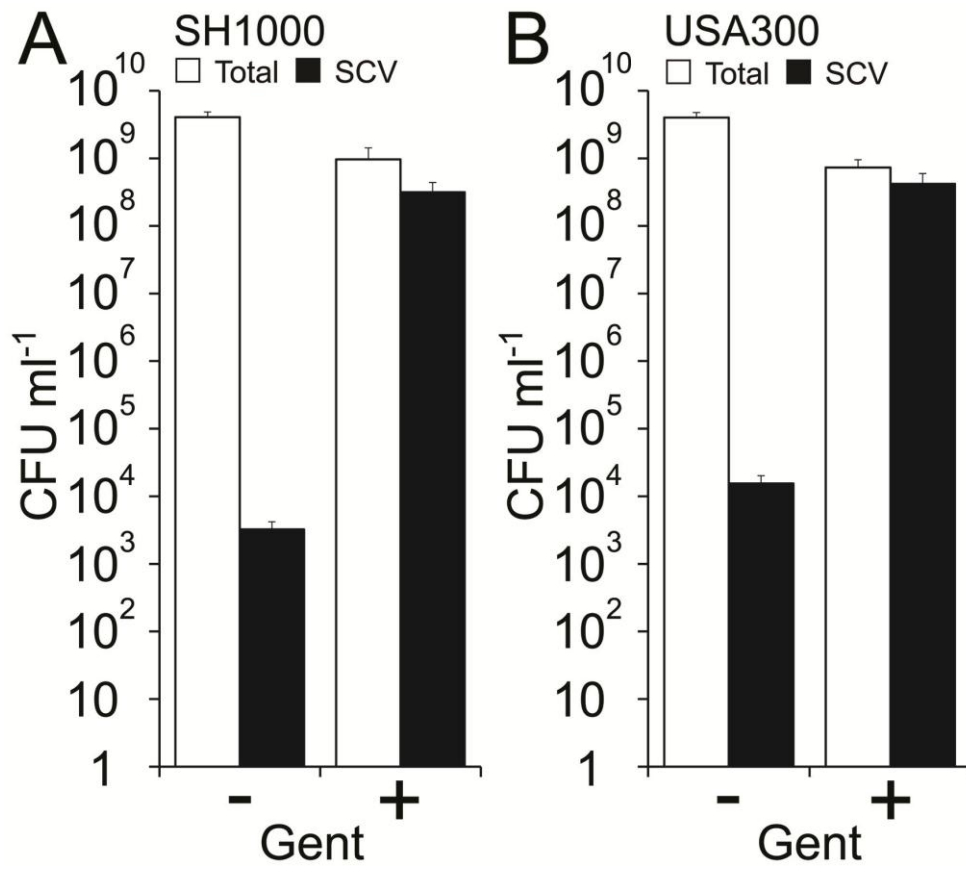

66

67

68 Figure S4. The composition of *S. aureus* SH1000 (A) and USA300 (B) cultures grown under highly  
69 oxygenated conditions in the absence or presence of gentamicin.
